# Supplementary material for: A new visual and stable fluorescent Cu-MOF as a dual-function sensor for glyphosate and Cr2O72−
Source: Royal Society of Chemistry journal article supplement (doi:10.1039/d2nj03186h), 2022-01-01
Supplement: d2nj03186h1.pdf [file d2nj03186h1.pdf]

**Note added on November 9, 2022: Some figures in this document have been altered from the version originally published. The authors were alerted to unintentional duplications of PXRD patterns in figures S3, S5, S6, and S15. The corrected data is now presented herein. This change does not affect the conclusions of the paper. The authors apologise for any confusion this may have caused.**

**Table S1.** Partial crystal data of the complex

| Identification code                       | Complex                                                        |
|-------------------------------------------|----------------------------------------------------------------|
| Empirical formula                         | C <sub>16</sub> H <sub>7</sub> Cu <sub>2</sub> O <sub>11</sub> |
| Formula weight                            | 502.32                                                         |
| Crystal system                            | monoclinic                                                     |
| Space group                               | <i>P</i> 2 <sub>1</sub> / <i>n</i>                             |
| a[Å]                                      | 10.860                                                         |
| b[Å]                                      | 18.909                                                         |
| c[Å]                                      | 14.779                                                         |
| α[o]                                      | 90                                                             |
| β[o]                                      | 92.130                                                         |
| γ[o]                                      | 90                                                             |
| V(Å <sup>3</sup> )                        | 3032.797                                                       |
| Z                                         | 4                                                              |
| F(000)                                    | 996.00                                                         |
| T(K)                                      | 296(2)                                                         |
| D <sub>calcd</sub> , g / cm <sup>-3</sup> | 1.100                                                          |
| μ (mm <sup>-1</sup> )                     | 1.438                                                          |
| reflections measured                      | 3.5° ≤ 2 θ ≤ 49.99°                                            |
| h,k,l                                     | -12 ≤ h ≤ 11, -22 ≤ k ≤ 18, -17 ≤ l ≤ 17                       |
| Data completeness                         | 0.987                                                          |
| unique                                    | 5262 [R <sub>int</sub> = 0.1635]                               |
| Final R indices (I > 2 σ (I))             | R <sub>1</sub> = 0.1448                                        |
| R indices (all data)                      | wR <sub>2</sub> = 0.2983                                       |

CCDC

2173080

Goodness-of-fit on  $F^2$ 

1.017

$$aR_1 = \frac{\sum ||F_0| - |F_c||}{\sum |F_0|}. \quad bwR_2 = \left[ \frac{\sum w (F_{O_2} - F_{C_2})^2}{\sum w (F_{O_2})^2} \right]^{1/2}$$

**Table S2.** Bond Lengths of Cu-MOF

| Atom                     | Length/Å  | Atom                    | Length/Å  |
|--------------------------|-----------|-------------------------|-----------|
| Cu(1)-Cu(2) <sup>1</sup> | 2.638(3)  | Cu(2)-O(7) <sup>6</sup> | 1.960(9)  |
| Cu(1)-O(1)               | 2.154(12) | Cu(2)-O(9)              | 1.960(9)  |
| Cu(1)-O(3)               | 1.872(12) | Cu(2)-O(10)             | 2.124(11) |
| Cu(1)-O(5) <sup>2</sup>  | 1.946(12) | O(2)-Cu(2) <sup>1</sup> | 1.947(13) |
| Cu(1)-O(6) <sup>3</sup>  | 1.988(9)  | O(4)-Cu(2) <sup>7</sup> | 2.000(12) |
| Cu(1)-O(8) <sup>1</sup>  | 2.007(8)  | O(5)-Cu(1) <sup>8</sup> | 1.946(12) |
| Cu(2)-Cu(1) <sup>4</sup> | 2.638(3)  | O(6)-Cu(1) <sup>3</sup> | 1.988(9)  |
| Cu(2)-O(2) <sup>4</sup>  | 1.947(13) | O(7)-Cu(2) <sup>9</sup> | 1.960(9)  |
| Cu(2)-O(4) <sup>5</sup>  | 2.000(12) | O(8)-Cu(1) <sup>4</sup> | 2.007(8)  |

<sup>1</sup>1/2-X, 1/2-Y, 1-Z; <sup>2</sup>1-X, 1-Y, 2-Z; <sup>3</sup>1/2+X, 1/2-Y, 1/2+Z; <sup>4</sup>1-X,+Y, 3/2-Z; <sup>5</sup>+X, 1-Y,-1/2+Z

**Table S3** Bond Angles of Cu-MOF

| <b>Atom</b>                                     | <b>Angle/°</b>       | <b>Atom</b>                                     | <b>Angle/°</b>       |
|-------------------------------------------------|----------------------|-------------------------------------------------|----------------------|
| O(1)-Cu(1)-<br>Cu(2) <sup>1</sup>               | 176.6(4)<br>185.2(3) | O(2) <sup>4</sup> -Cu(2)-<br>O(10)              | 97.0(5)<br>83.5(3)   |
| O(3)-Cu(1)-<br>Cu(2) <sup>1</sup>               | 97.3(5)<br>168.7(4)  | O(4) <sup>5</sup> -Cu(2)-<br>Cu(1) <sup>4</sup> | 98.1(5)<br>86.1(3)   |
| O(3)-Cu(1)-O(1)                                 | 87.5(5)              | O(4) <sup>5</sup> -Cu(2)-<br>O(10)              | 88.6(5)<br>97.3(4)   |
| O(3)-Cu(1)-O(5) <sup>2</sup>                    | 90.6(5)              | O(7) <sup>6</sup> -Cu(2)-<br>Cu(1) <sup>4</sup> | 84.5(3)<br>90.4(5)   |
| O(3)-Cu(1)-O(6) <sup>3</sup>                    | 183.6(3)             | O(7) <sup>6</sup> -Cu(2)-<br>O(4) <sup>5</sup>  | 170.6(4)<br>92.0(4)  |
| O(3)-Cu(1)-O(8) <sup>1</sup>                    | 93.9(5)              | O(7) <sup>6</sup> -Cu(2)-<br>O(10)              | 176.2(4)<br>125.8(9) |
| O(5) <sup>2</sup> -Cu(1)-<br>Cu(2)              | 389.4(5)<br>189.4(5) | O(9)-Cu(2)-<br>Cu(1) <sup>4</sup>               | 125.3(9)<br>123.2(9) |
| O(5) <sup>2</sup> -Cu(1)-O(1)                   | 181.6(3)             | O(9)-Cu(2)-O(4) <sup>5</sup>                    | 125.8(9)             |
| O(5) <sup>2</sup> -Cu(1)-O(6)                   | 96.2(5)              | O(9)-Cu(2)-O(7) <sup>6</sup>                    | 125.1(8)             |
| O(5) <sup>2</sup> -Cu(1)-O(8)                   | 164.2(4)             | O(9)-Cu(2)-O(10)                                | 121.4(7)             |
| O(6) <sup>3</sup> -Cu(1)-<br>Cu(2)              | 182.7(3)<br>99.5(5)  | O(10)-Cu(2)-<br>Cu(1) <sup>4</sup>              | 123.3(7)<br>123.1(8) |
| O(6) <sup>3</sup> -Cu(1)-O(1)                   | 81.5(3)              | C(1)-O(2)-Cu(2) <sup>1</sup>                    |                      |
| O(6) <sup>3</sup> -Cu(1)-<br>O(8) <sup>1</sup>  | 164.9(5)<br>89.3(5)  | C(1)-O(3)-Cu(1)                                 |                      |
| O(8) <sup>1</sup> -Cu(1)-<br>Cu(2)              | 89.1(5)              | C(8)-O(4)-Cu(2) <sup>7</sup>                    |                      |
| O(8) <sup>1</sup> -Cu(1)-O(1)                   |                      | C(8)-O(5)-Cu(1) <sup>8</sup>                    |                      |
| O(2) <sup>4</sup> -Cu(2)-<br>Cu(1) <sup>4</sup> |                      | C(15)-O(6)-<br>Cu(1) <sup>3</sup>               |                      |
| O(2) <sup>4</sup> -Cu(2)-<br>O(4) <sup>5</sup>  |                      | C(15)-O(7)-                                     |                      |
| O(2) <sup>4</sup> -Cu(2)-                       |                      |                                                 |                      |

---

O(7)<sup>6</sup>  
O(2)<sup>4</sup>-Cu(2)-O(9)

Cu(2)<sup>9</sup>  
C(16)-O(8)-  
Cu(1)<sup>4</sup>  
C(16)-O(9)-Cu(2)

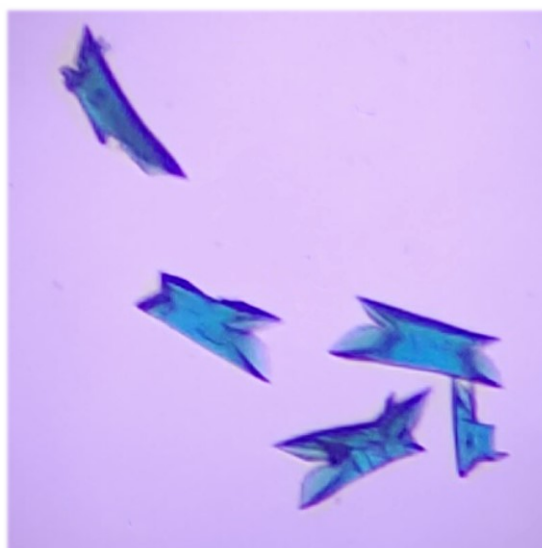

**Fig. S1** The picture of crystal

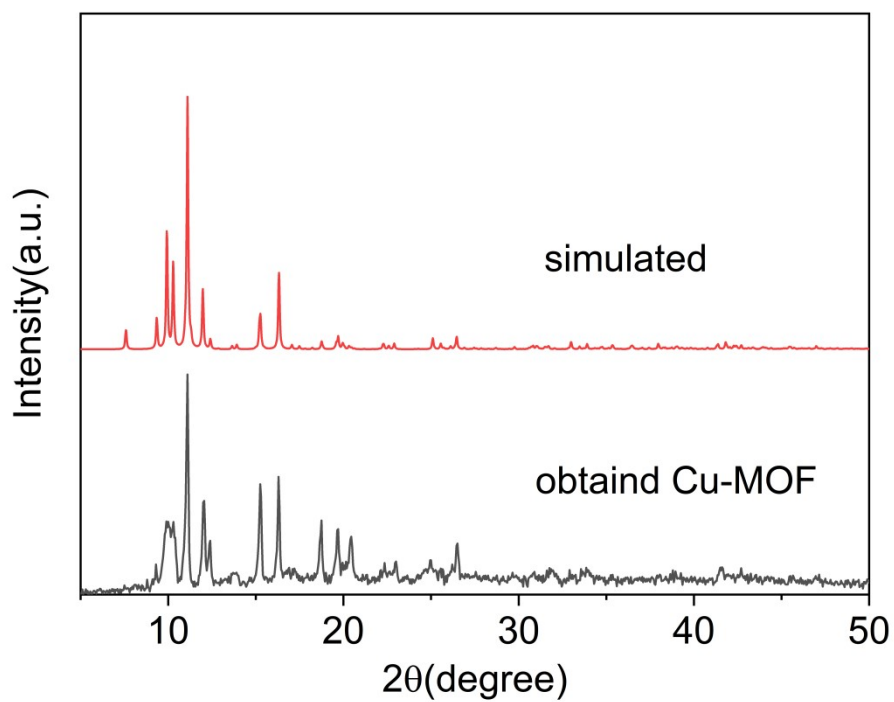

**Fig. S2** The PXRD patterns of Cu-MOF

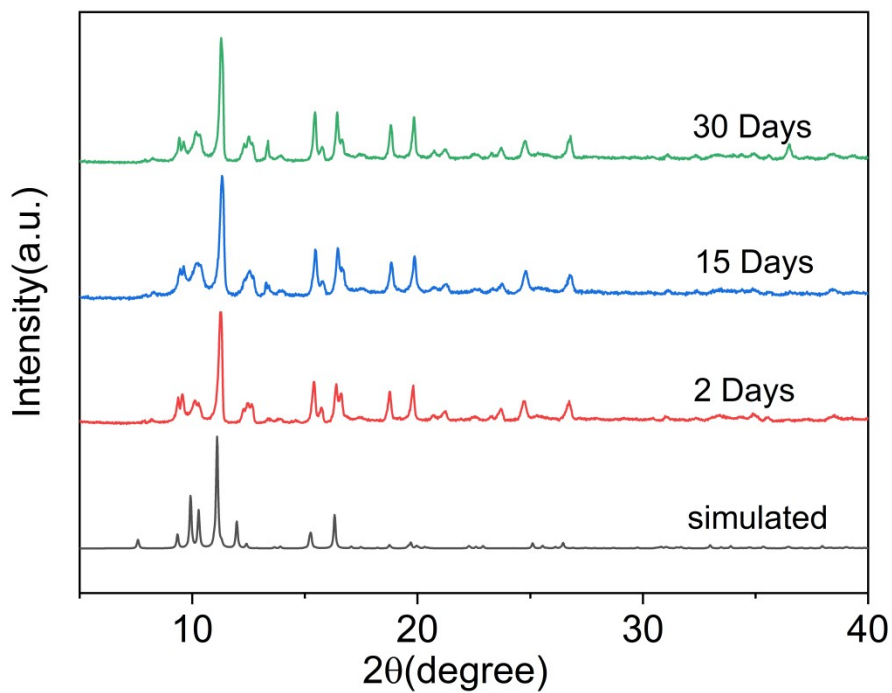

**Fig. S3.** PXRD patterns of Cu-MOF after immersion in water for 48 hours, 15days, 30

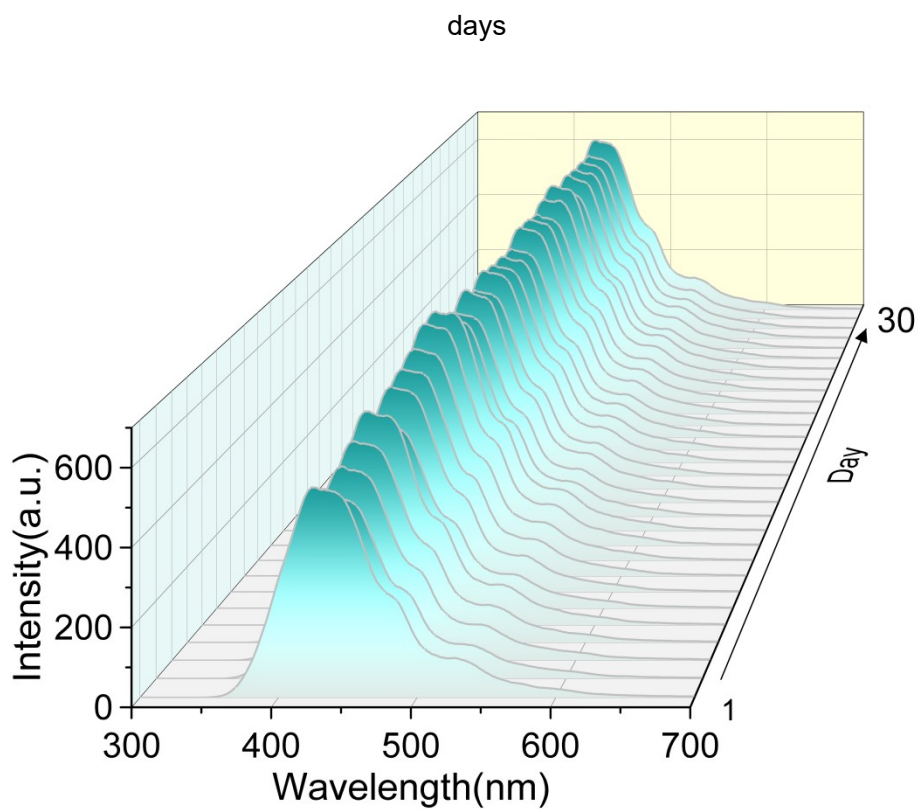

**Fig. S4.** Fluorescence spectra after immersion in water for 30 days

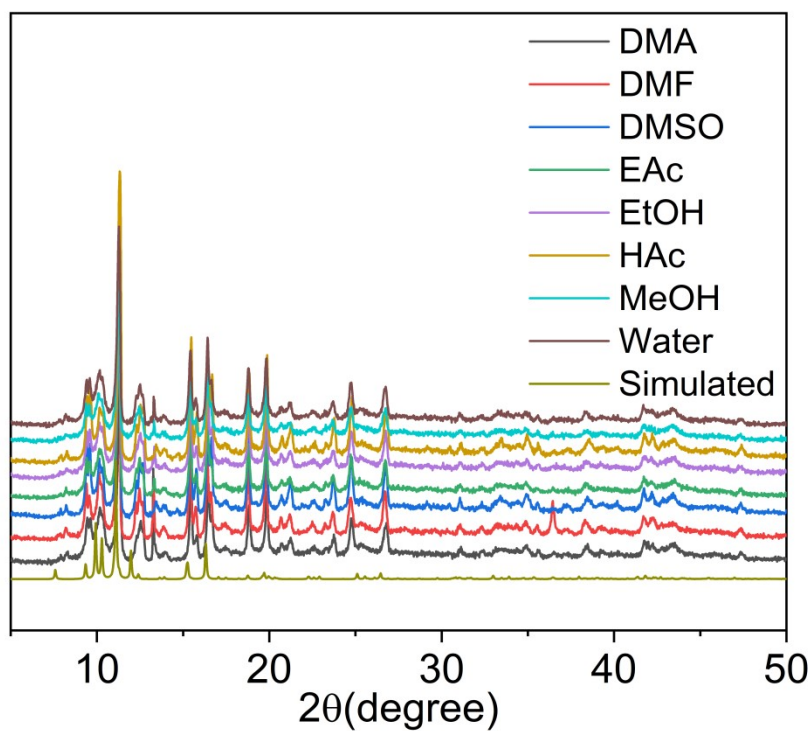

**Fig. S5.** The Powder X-ray diffraction patterns of compound 1 immersed in different

solvents at room temperature.

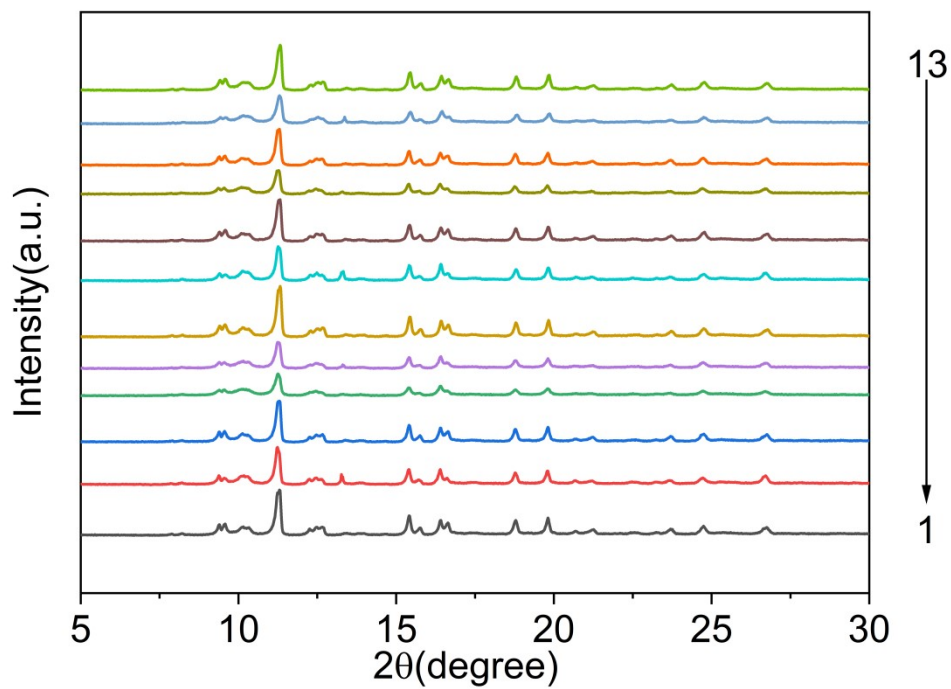

**Fig. S6.** PXRD patterns of Cu-MOF after immersion in pH (2-13) for 48 hours.

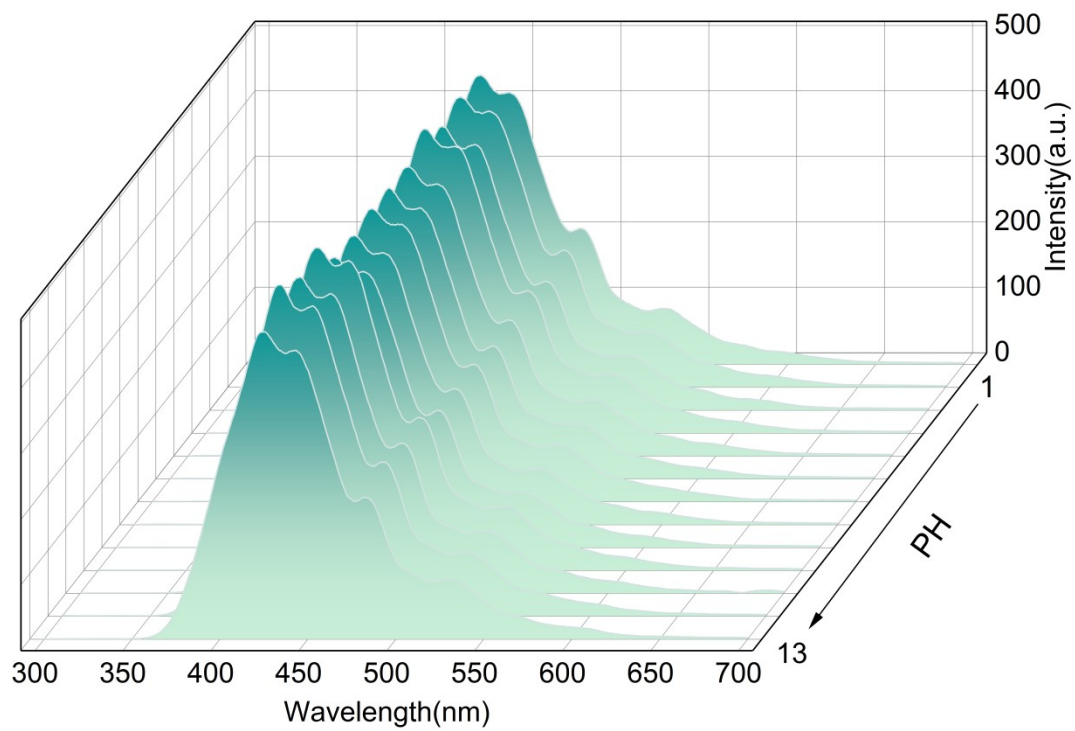

**Fig. S7.** Fluorescence spectra of Cu-MOF immersed in different pH for 48 hours.

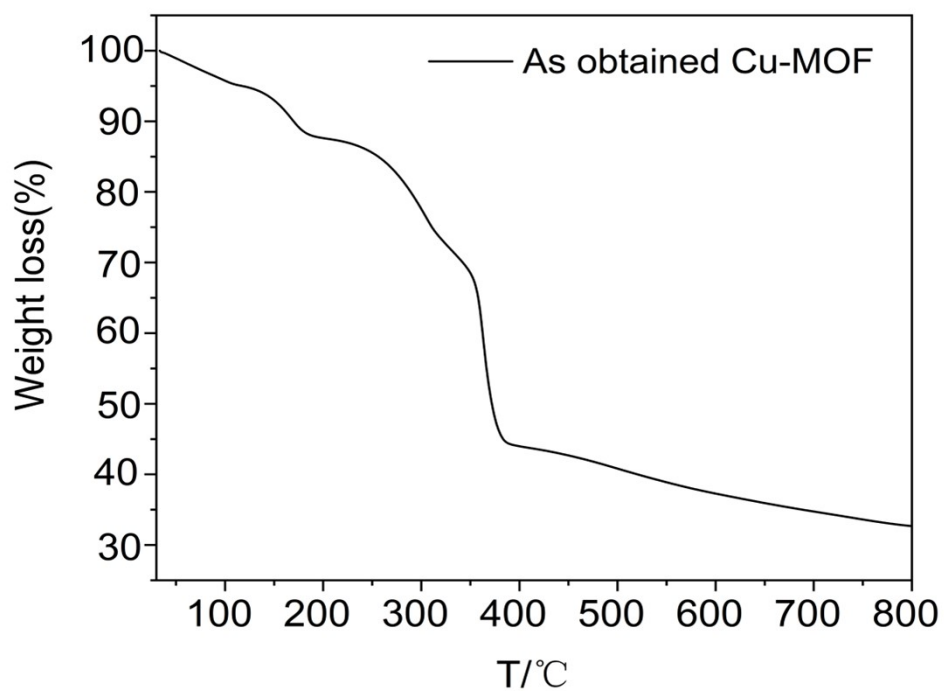

**Fig. S8.** The TGA curve of Cu-MOF

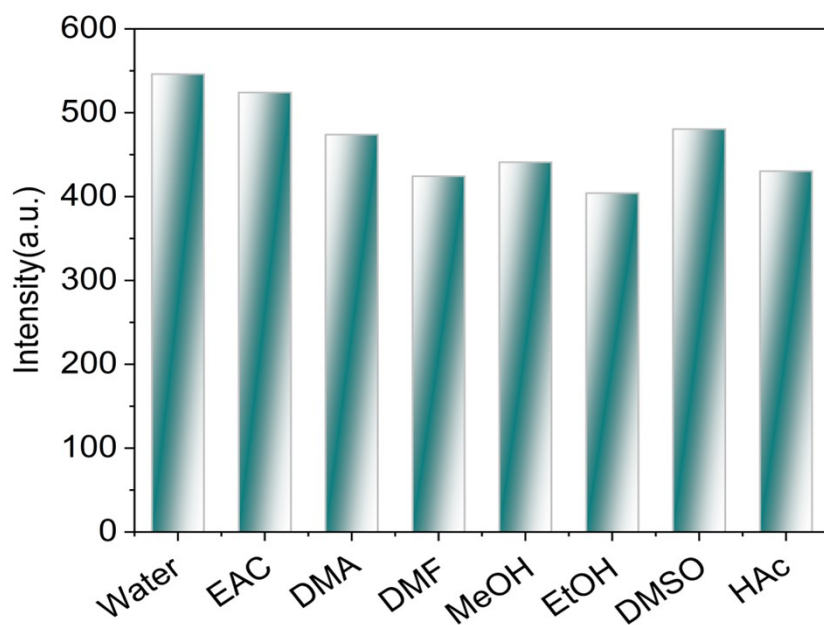



**Fig. S9.** Solvent selection

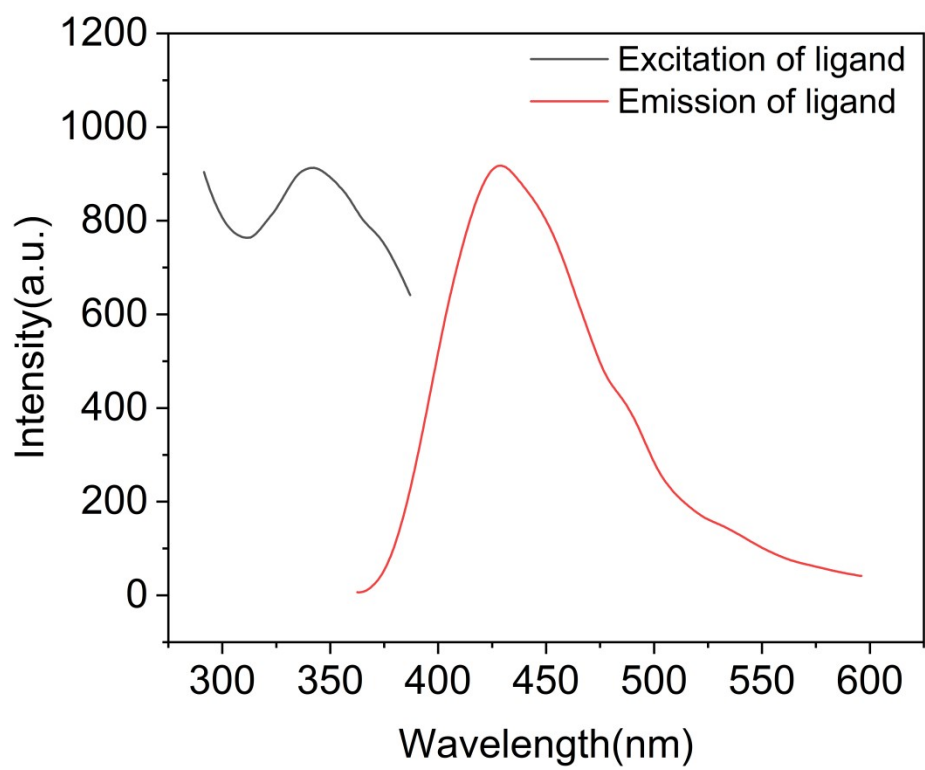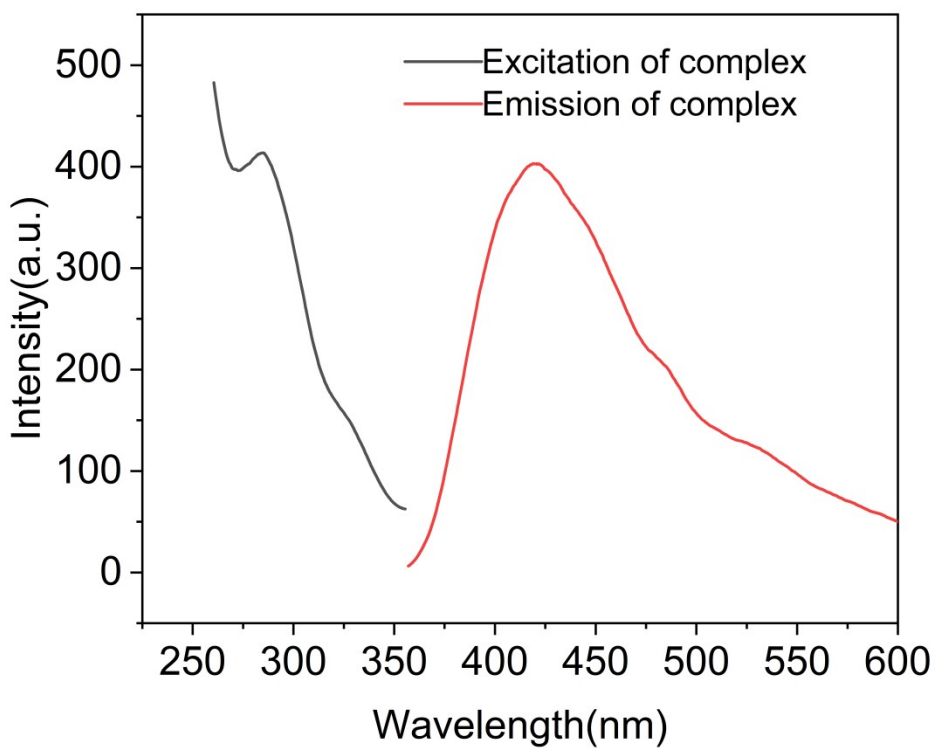

**Fig. S10.** Solid-state fluorescence spectra of complex and ligand .

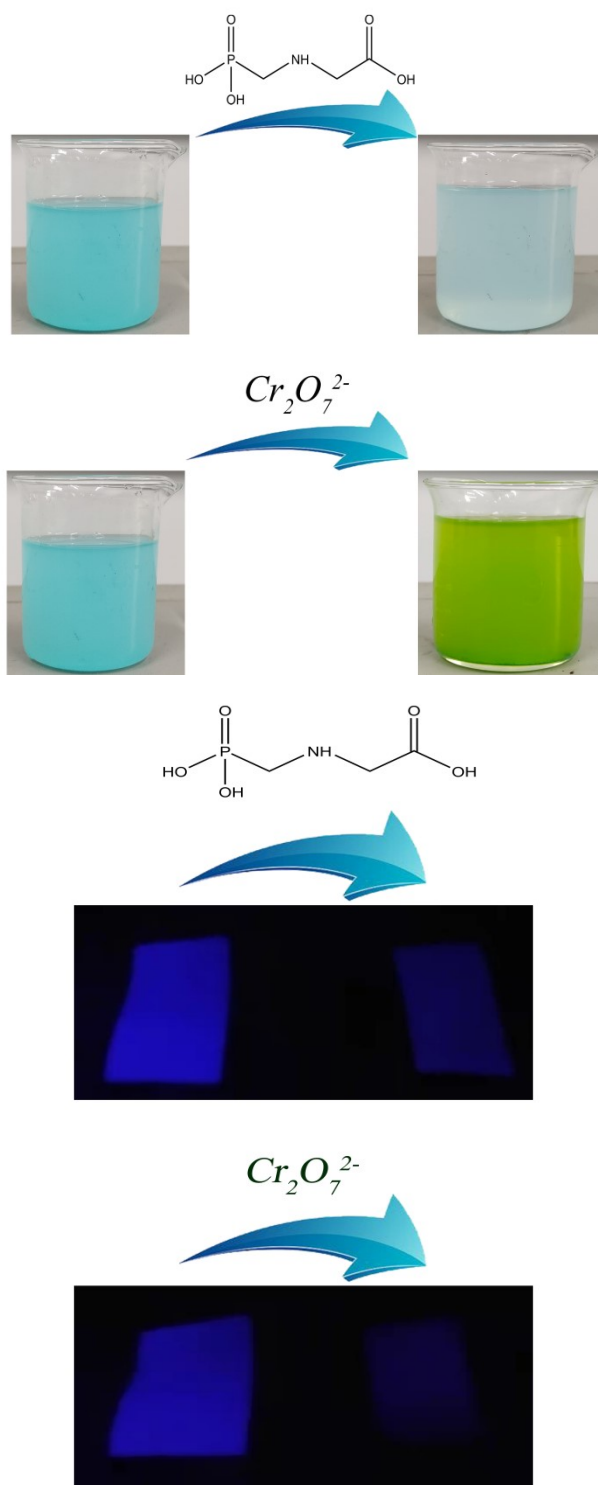

**Fig. S11.** Color change

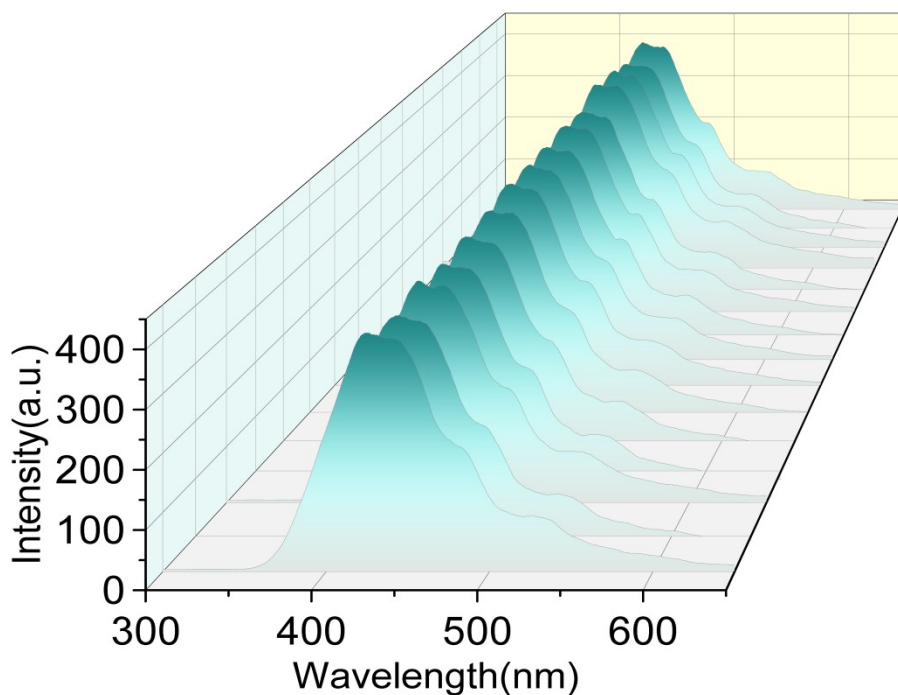

**Fig. S12.** Blank experiment

**Table S4.** Calculated detection limit

---


$$I_0/I = K_{SV}[Q] + b \quad (1)$$


---

$$LOD = 3\sigma/K_{SV} \quad (2)$$


---

$$\sigma = S/\bar{x} * 100\% \quad (3)$$


---

$$S = \sqrt{\frac{\sum_{i=1}^n (x_i - \bar{x})^2}{n-1}} \quad (4)$$


---

The standard deviation is calculated according to the blank experiment

---

$$\bar{x} = 393.32$$


---

$X_i = 393.667, 393.658, 393.593, 393.57, 393.02, 392.913, 392.894, 393.063, 393.59, 393.743, 392.992, 393.97, 393.68, 393.658, 393.677$  ( $\lambda_{em}=424\text{nm}$ )

---

According to the ratio of formula 3 and 4,  $S = 0.353$   $\sigma = 0.09$

---

**Glyphosate**

---

$$I_0/I = 3.75 \times 10^3 [Q] - 0.297$$

According to the ratio of formula 2, LOD = 0.072  $\mu$ M

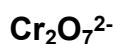

$$I_0/I = 2.701 \times 10^3 [Q] - 0.2144$$

According to the ratio of formula 2, LOD = 0.099  $\mu$ M

**Table S5.** A comparison of limit of detection (LOD) of various sensors for sensing glyphosate (Glyp)

| Sensor                                                                                     | Analyst | LOD [ $\mu$ M]         | Ref. |
|--------------------------------------------------------------------------------------------|---------|------------------------|------|
| Uio-67/Ce-PC                                                                               | Glyp    | 0.0062                 | [1]  |
| Uio-67                                                                                     | Glyp    | 0.0236                 | [1]  |
| [Tb(L) <sub>2</sub> NO <sub>3</sub> ] <sub>n</sub>                                         | Glyp    | 0.0144                 | [2]  |
| 3D<br>{[Cd <sub>2</sub> (5-NO <sub>2</sub> -BDC) <sub>2</sub> L(MeOH)]·2MeOH} <sub>n</sub> | Glyp    | 31.9                   | [3]  |
| 2D<br>{[Cd <sub>2</sub> (5-NO <sub>2</sub> -BDC) <sub>2</sub> L(MeOH)]·2MeOH} <sub>n</sub> | Glyp    | 2.25                   | [3]  |
| Fe <sub>3</sub> O <sub>4</sub> @SiO <sub>2</sub> @UiO-67                                   | Glyp    | 0.093                  | [4]  |
| [Cd(NH <sub>2</sub> -bdc)(azp)]·DMF                                                        | Glyp    | 0.025                  | [5]  |
| CuOx@mC composite                                                                          | Glyp    | 7.69*10 <sup>-10</sup> | [6]  |
| Cu-BTC MOF                                                                                 | Glyp    | 1.4*10 <sup>-7</sup>   | [7]  |
| Cu-BTC MOF/g-C <sub>3</sub> N <sub>4</sub>                                                 | Glyp    | 1.3*10 <sup>-7</sup>   | [8]  |
| Co-H <sub>2</sub> ABDC MOF                                                                 | Glyp    | 0.00023                | [9]  |

|                                                             |      |       |           |
|-------------------------------------------------------------|------|-------|-----------|
| $[\text{Cu}_2(\text{H}_4\text{L})(\text{H}_2\text{O})_2]_n$ | Glyp | 0.072 | This work |
|-------------------------------------------------------------|------|-------|-----------|

**Table S6.** A comparison of limit of detection (LOD) of various sensors for sensing

| $\text{Cr}_2\text{O}_7^{2-}$                                                                                      |                              |                       |           |
|-------------------------------------------------------------------------------------------------------------------|------------------------------|-----------------------|-----------|
| Sensor                                                                                                            | Analyst                      | LOD [ $\mu\text{M}$ ] | Ref       |
| $[\text{Ni}_2(\mu_2\text{-OH})(\text{azdc})(\text{tpim})](\text{NO}_3) \cdot 6\text{DMA} \cdot 6\text{MeOH}$      | $\text{Cr}_2\text{O}_7^{2-}$ | 0.95                  | [10]      |
| UiO-66-NH <sub>2</sub> @eosin Y composite                                                                         | $\text{Cr}_2\text{O}_7^{2-}$ | 0.0223                | [11]      |
| $[\text{Zn}(\text{byia})(\text{DMF})] \cdot 1.5\text{DMF} \cdot 7\text{H}_2\text{O}$                              | $\text{Cr}_2\text{O}_7^{2-}$ | 1.04                  | [12]      |
| $[(\text{CH}_3)_2\text{NH}_2][\text{In}(\text{TNB})_{4/3}] \cdot (2\text{DMF})(3\text{H}_2\text{O})$              | $\text{Cr}_2\text{O}_7^{2-}$ | 0.079                 | [13]      |
| $[\text{Zn}_7(\text{TPPE})_2(\text{SO}_4^{2-})_7](\text{DMF} \cdot \text{H}_2\text{O})$                           | $\text{Cr}_2\text{O}_7^{2-}$ | 0.0926                | [14]      |
| $[\text{Eu}_2(\text{tpbpc})_4 \cdot \text{CO}_3 \cdot 4\text{H}_2\text{O}] \cdot \text{DMF} \cdot \text{solvent}$ | $\text{Cr}_2\text{O}_7^{2-}$ | 0.34                  | [15]      |
| $[\text{Eu}(\text{L})(\text{HCOO})(\text{H}_2\text{O})]_n$                                                        | $\text{Cr}_2\text{O}_7^{2-}$ | 1.23                  | [16]      |
| $[\text{Cd}-1.5(\text{L})(2)(\text{bpy})(\text{NO}_3)]$                                                           | $\text{Cr}_2\text{O}_7^{2-}$ | 0.39                  | [17]      |
| $[\text{Cu}_2(\text{H}_4\text{L})(\text{H}_2\text{O})_2]_n$                                                       | $\text{Cr}_2\text{O}_7^{2-}$ | 0.099                 | This work |

### Supplementary references

- [1] Y. Qiang, W. Yang, X. Zhang, X. Luo, W. Tang, T. Yue and Z. Li, *Microchimica Acta*, 2022, **189**, 1-11.
- [2] Y. Li, S. Wu, Y. Zhang, Z. Ma, M. Zhu and E. Gao, *Inorganica Chimica Acta*, 2021, **528**, 120632.
- [3] C.-X. Yu, F.-L. Hu, J.-G. Song, J.-L. Zhang, S.-S. Liu, B.-X. Wang, H. Meng, L.-L. Liu and L.-F. Ma, *Sensors and Actuators B: Chemical*, 2020, **310**, 127819.

- [4] Q. Yang, J. Wang, X. Chen, W. Yang, H. Pei, N. Hu, Z. Li, Y. Suo, T. Li and J. Wang, *Journal of Materials Chemistry A*, 2018, **6**, 2184-2192.
- [5] T. Wiwasuku, J. Boonmak, R. Burakham, S. Hadsadee, S. Jungsuttiwong, S. Bureekaew, V. Promarak and S. Youngme, *Inorganic Chemistry Frontiers*, 2021, **8**, 977-988.
- [6] C. Gu, Q. Wang, L. Zhang, P. Yang, Y. Xie and J. Fei, *Sensors and Actuators B: Chemical*, 2020, **305**, 127478.
- [7] Y. Cao, L. Wang, C. Shen, C. Wang, X. Hu and G. Wang, *Sensors and Actuators B: Chemical*, 2019, **283**, 487-494.
- [8] Y. Cao, L. Wang, C. Wang, X. Hu, Y. Liu and G. Wang, *Electrochimica Acta*, 2019, **317**, 341-347.
- [9] N. Gokila, K. Muthumalai, Y. Haldorai and R. T. R. Kumar, *Chemical Physics Letters*, 2022, **795**, 139481.
- [10] R. Goswami, N. Seal, S. R. Dash, A. Tyagi and S. Neogi, *ACS applied materials & interfaces*, 2019, **11**, 40134-40150.
- [11] C. Gogoi and S. Biswas, *Dalton Transactions*, 2018, **47**, 14696-14705.
- [12] Y. Wan, X.-M. Chen, Q. Zhang, H.-B. Jiang and R. Feng, *Designed Monomers and Polymers*, 2021, **24**, 218-225.
- [13] H.-R. Fu, Y. Zhao, T. Xie, M.-L. Han, L.-F. Ma and S.-Q. Zang, *Journal of Materials Chemistry C*, 2018, **6**, 6440-6448.
- [14] X.-X. Wu, H.-R. Fu, M.-L. Han, Z. Zhou and L.-F. Ma, *Crystal Growth & Design*, 2017, **17**, 6041-6048.

[15] J. Liu, G. Ji, J. Xiao and Z. Liu, *Inorganic Chemistry*, 2017, **56**, 4197-4205.

[16] Z. Sun, M. Yang, Y. Ma, L. C. Li, *Cryst. Growth Des.*, 2017, **17**, 4326–4335.

[17] M. Singh, G. Kumar and S. Neogi, *Frontiers in chemistry*, 2021, **9**.

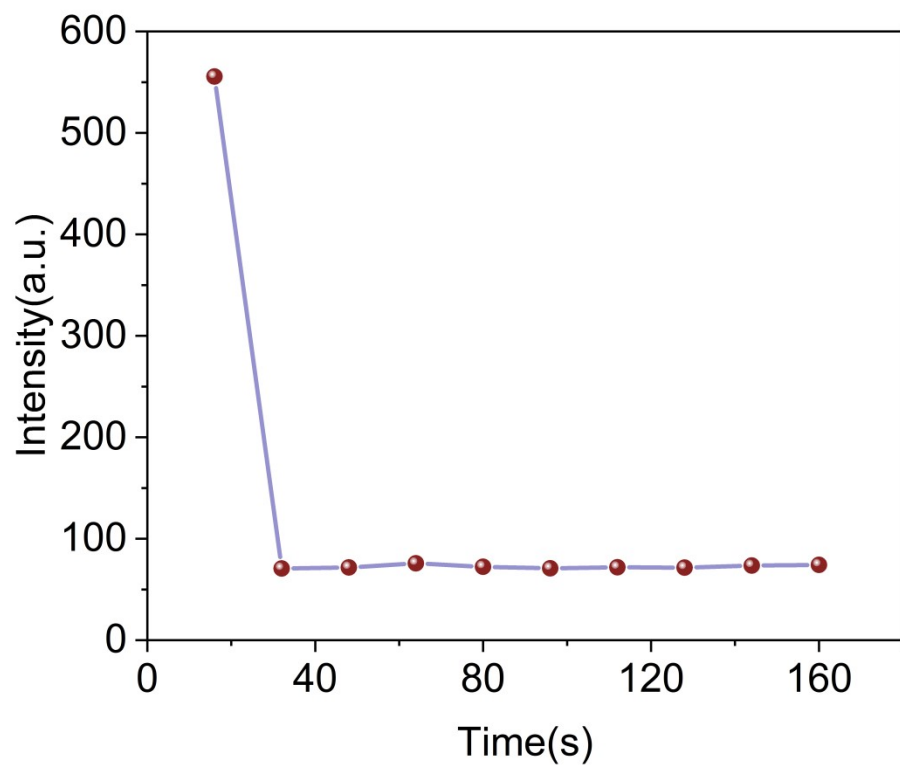

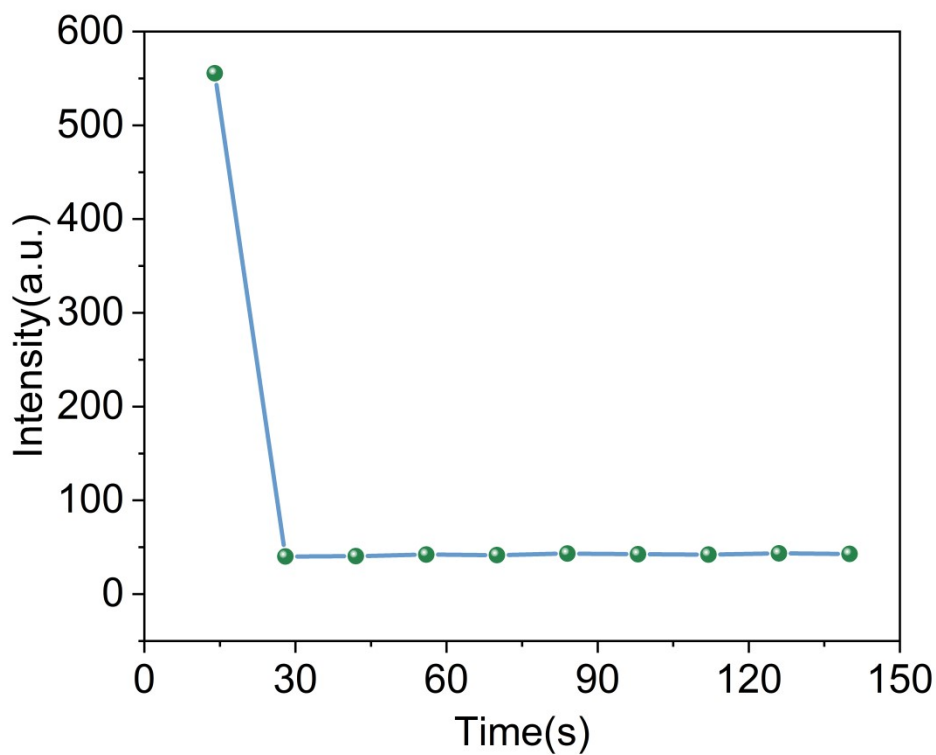

**Fig. S13.** Photo response time

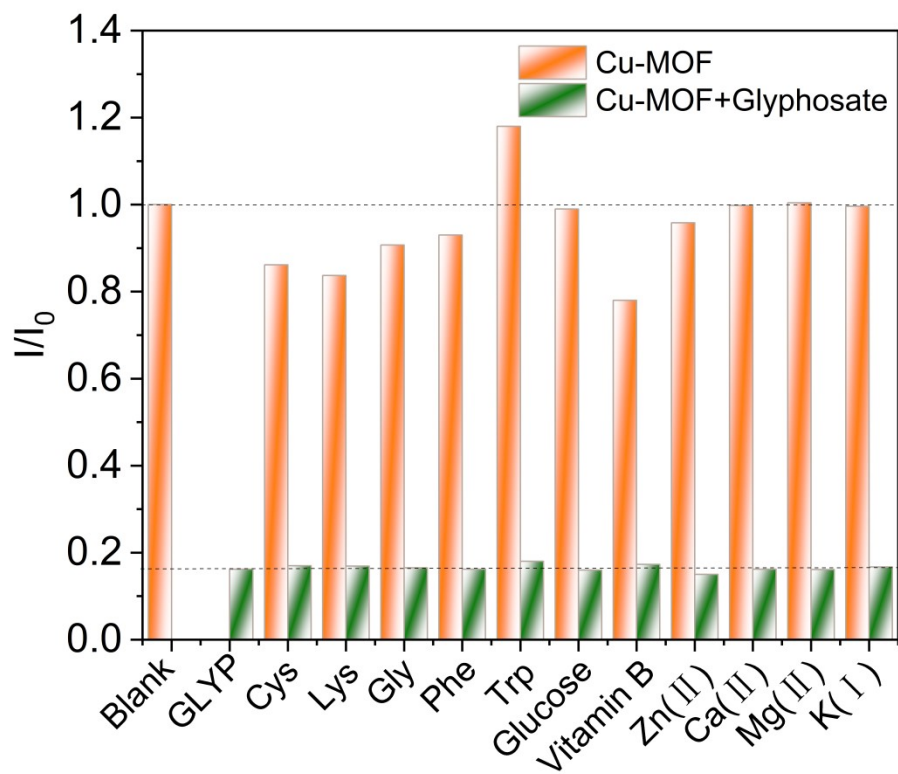



**Fig. S14.** The selectivity and anti-interference ability of Cu-MOF sensor ( $3 \text{ mg mL}^{-1}$ ) toward glyphosate ( $0.056 \text{ mg mL}^{-1}$ ) with interfering species.

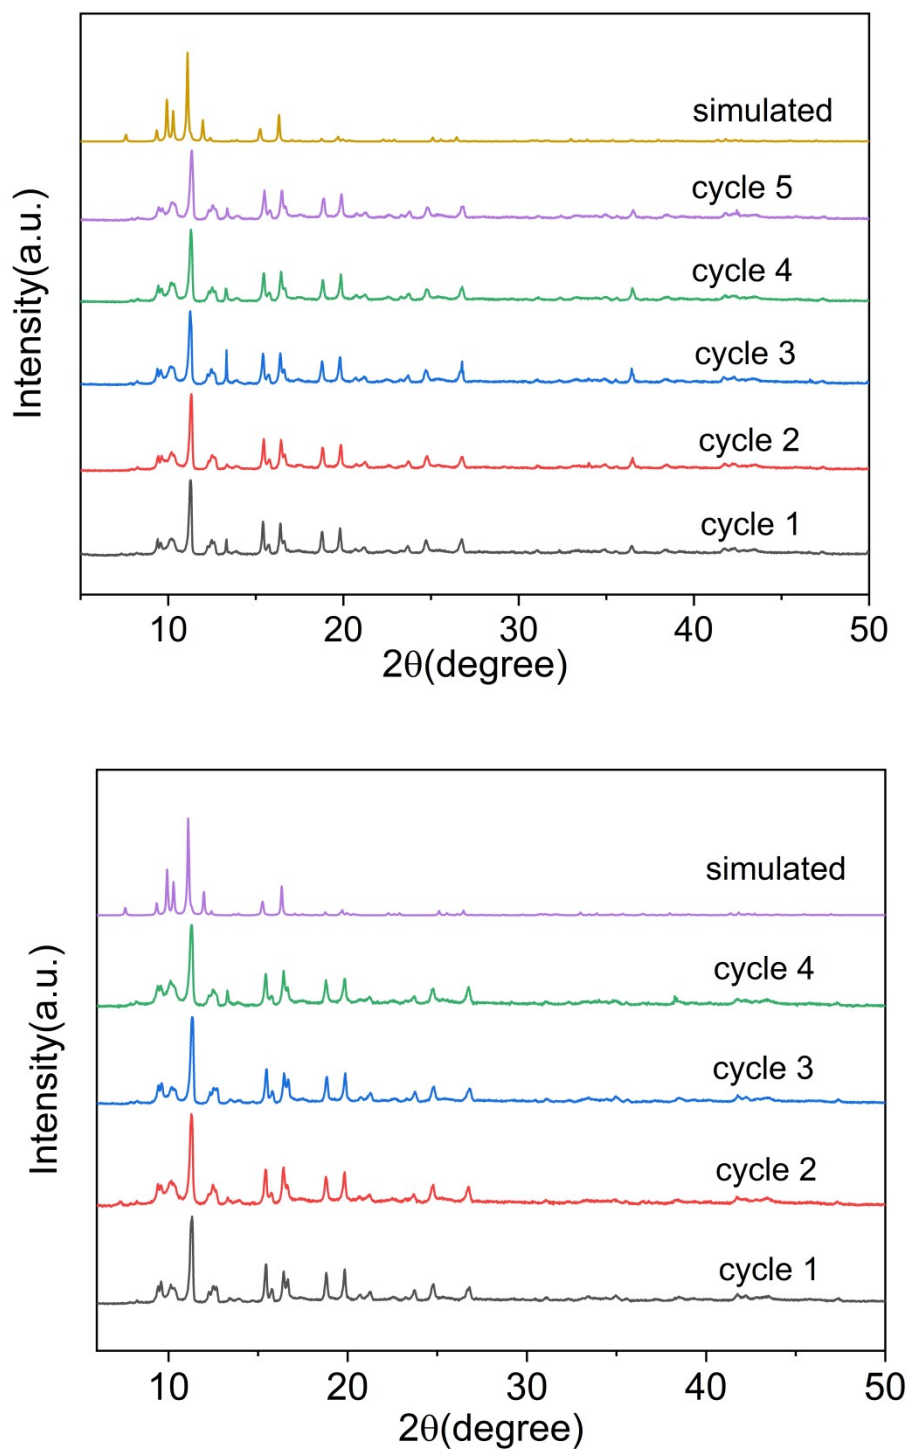

**Fig. S15.** The PXRD patterns of the complex after using recycles

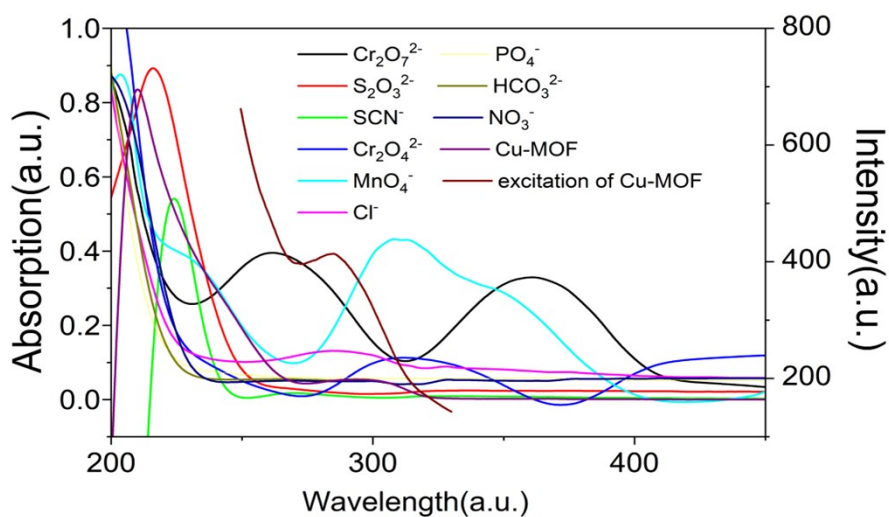

**Fig. S16.** Spectral overlap between the excitation spectrum of the complex and the absorption spectrum of different anions

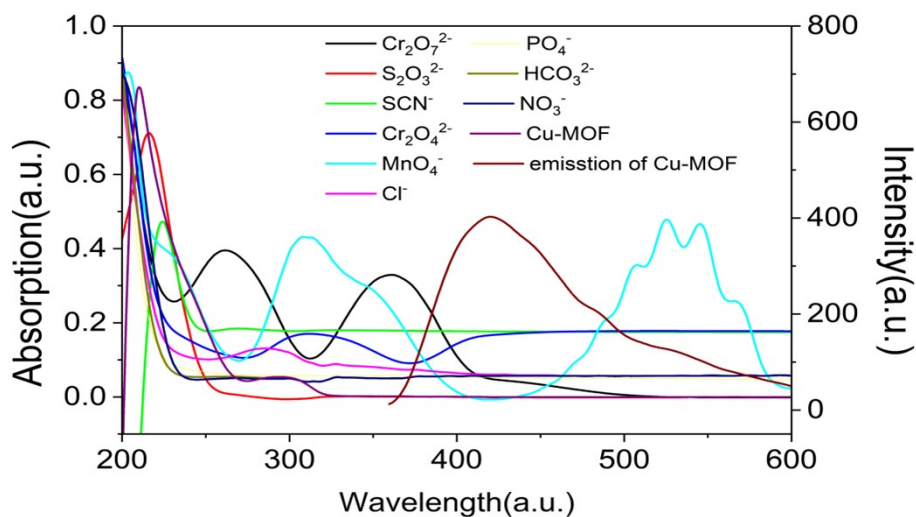

**Fig. S17.** Spectral overlap between the emission spectrum of the complex and the

absorption spectrum of different anions

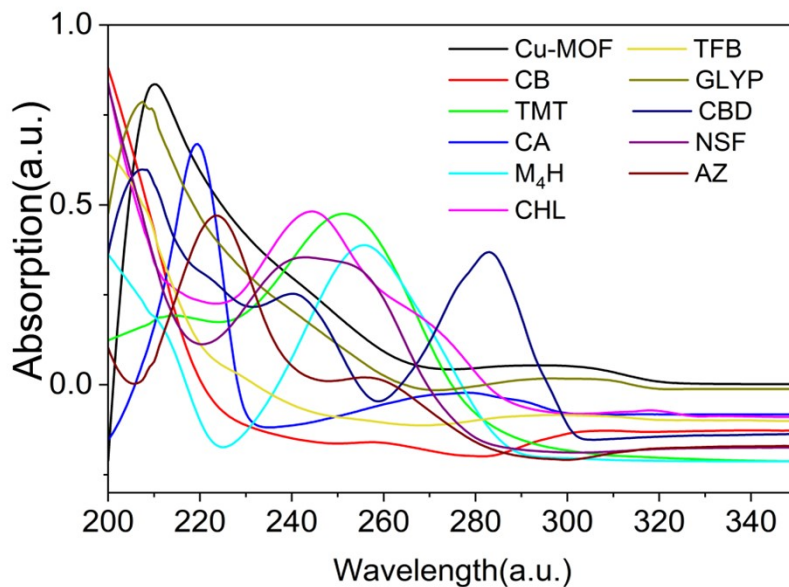

**Fig. S18.** Pesticides UV spectrum

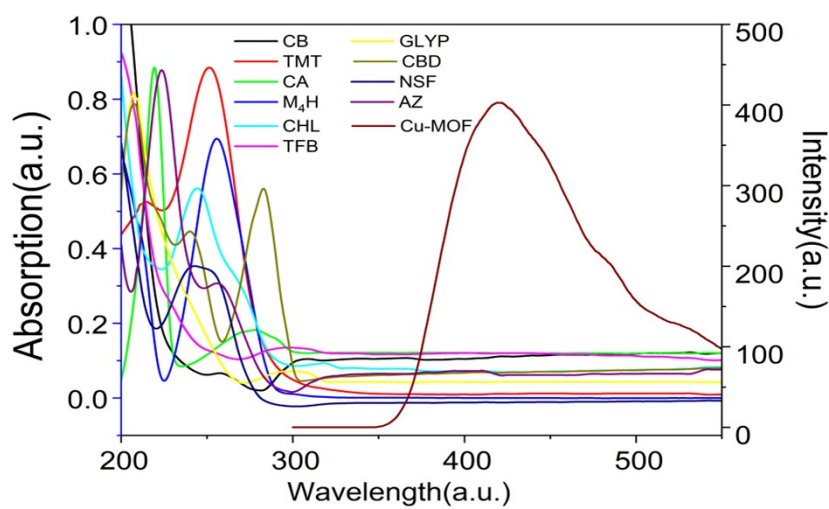

**Fig. S19.** Seen the emission spectrum of the complex and the absorption spectrum of different pesticides

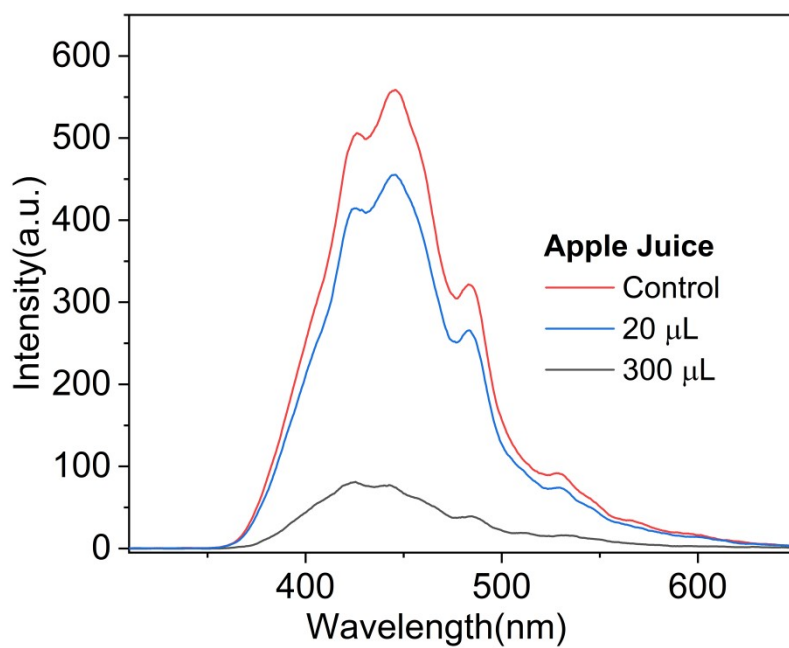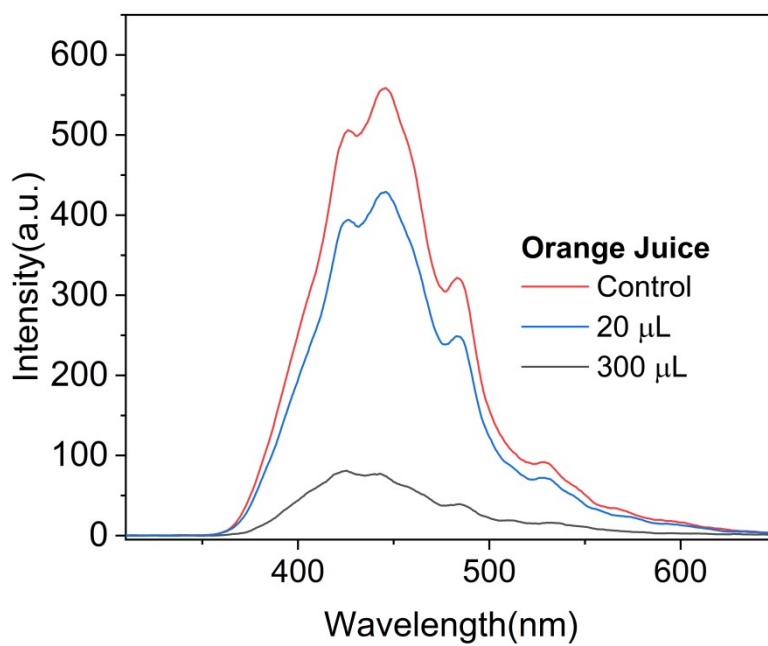

**Fig. S20.** The luminescence intensity of Cu-MOF in different samples

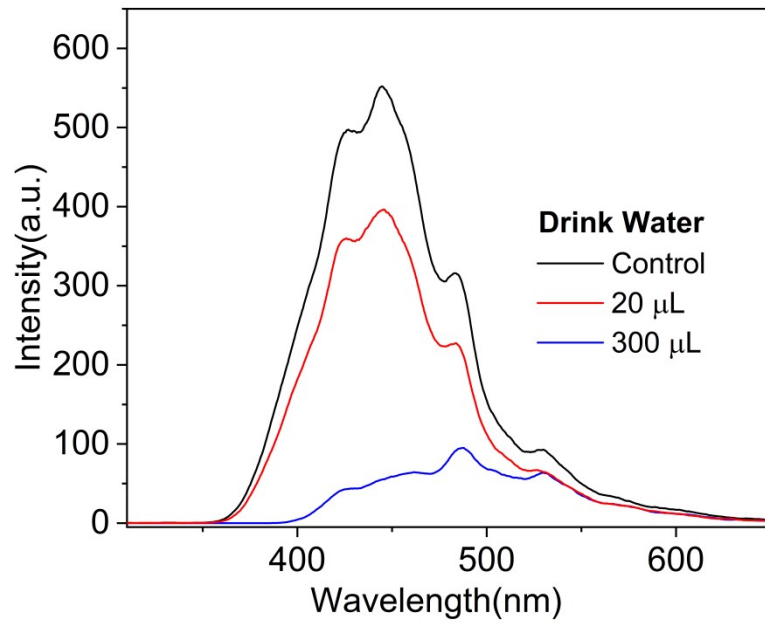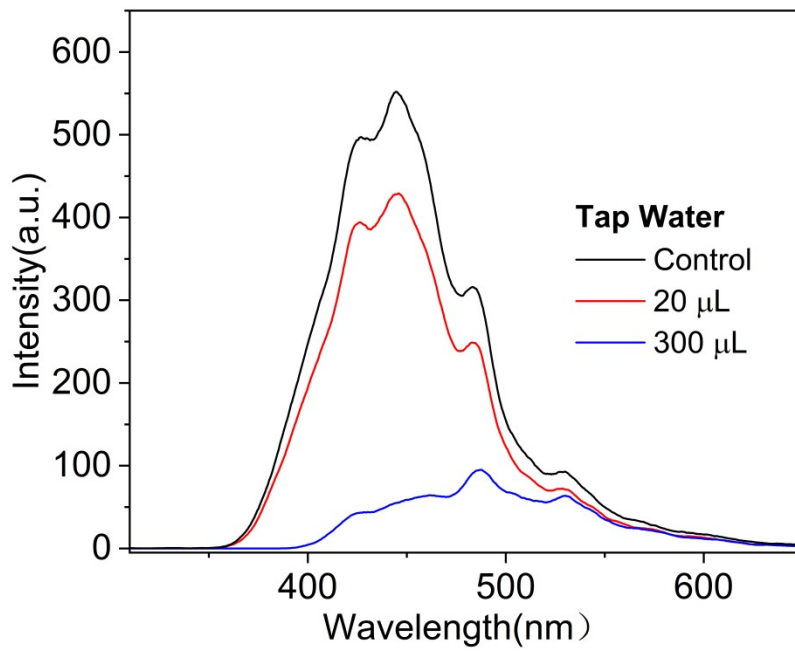

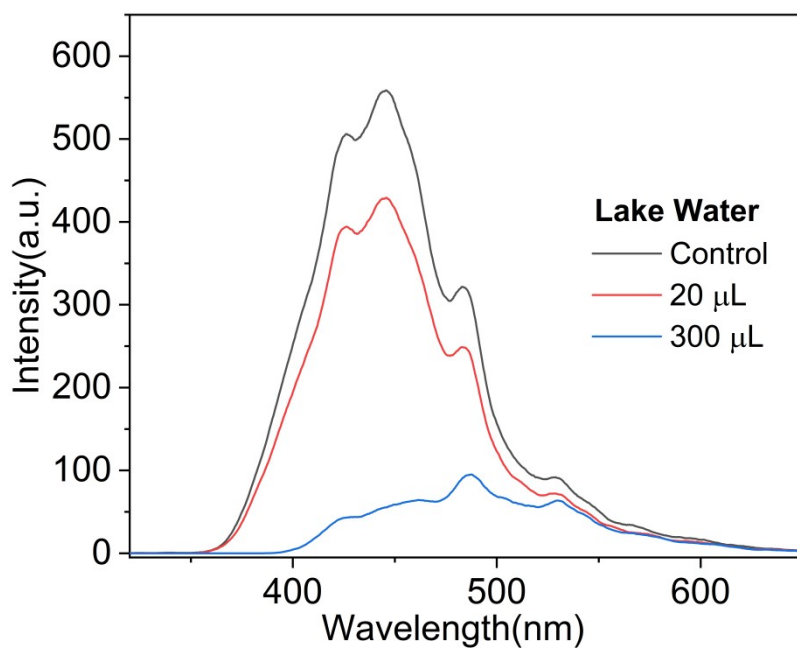

**Fig. S21.** The luminescence intensity of Cu-MOF in different water conditions

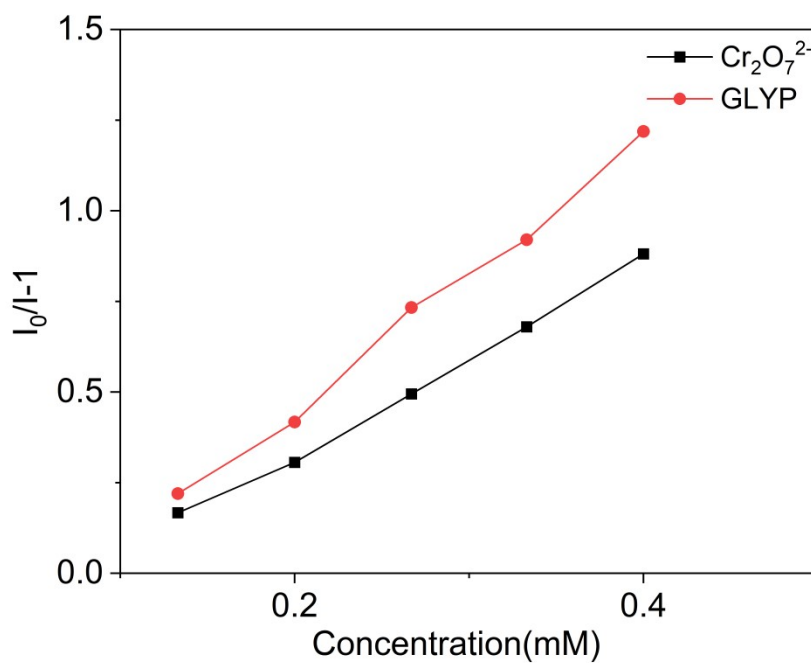

**Fig. S22.** Concentration fitting curve comparison
